# Supplementary material
Source: Springer Nature journal article supplement (https://www.springermedizin.de/resource/supplementary/13063_2012_1023_MOESM1_ESM.pdf/9619254)
Supplement: MOESM1 [file 9619254]

AgeWell Centre established

All over 50s attending informed of study by researchers and Centre staff, and invited to participate; no exclusions  
Expected n approached = 100  
Consent taken from those willing to participate

Baseline assessment  
n = 75

Randomisation n = 75  
Researcher triggers randomisation; results sent to interviewer; interviewer sets up initial interview

Group 1  
General chat  
n = 25

Group 2  
Goal-setting interview  
n = 25

Group 3  
Goal-setting interview  
With follow-up  
telephone mentoring  
n = 25

Ongoing participation in Centre  
according to personal choice for 12 months

In-depth  
interviews  
n = 25

Group 1  
Follow-up chat  
at 12 months

Group 2  
Follow-up interview  
at 12 months

Group 3  
Follow-up interview  
at 12 months

Interviewer triggers follow-up assessment

12 month follow-up assessment  
by blinded researcher
